# Supplementary material for: Nanogels from Metal-Chelating Crosslinkers as Versatile Platforms Applied to Copper-64 PET Imaging of Tumors and Metastases
Source: PubMed Central journal article supplement — Theranostics. 2015 Jan 1;5(3):277–88. doi: 10.7150/thno.10904 (PMC4279191; doi:10.7150/thno.10904), 2015-01-01
Supplement: thnov05p0277s1.pdf [file thnov05p0277s1.pdf]

# Nanogels from Metal-Chelating Crosslinkers as Versatile Platforms Applied to Copper-64 PET Imaging of Tumors and Metastases

*Jacques Lux,<sup>a,‡</sup> Alexander G. White,<sup>b,‡</sup> Minnie Chan,<sup>a</sup> Carolyn J. Anderson,<sup>b,\*</sup> and Adah Almutairi<sup>a,\*</sup>*

<sup>a</sup> Dr. Jacques Lux, Minnie Chan, Prof. Adah Almutairi, Skaggs School of Pharmacy and Pharmaceutical Sciences, KACST-UCSD Center of Excellence in Nanomedicine and Engineering, and the Laboratory of Bioresponsive Materials, University of California, San Diego. 9500 Gilman Dr. 0600, PSB 2270, La Jolla, CA-92093-0600, United States. E-mail:

[aalmutairi@ucsd.edu](mailto:aalmutairi@ucsd.edu).

<sup>b</sup> Dr. Alexander White, Prof. Carolyn Anderson, University of Pittsburgh Department of Radiology, Molecular Imaging Laboratory, Suite 452, 100 Technology Drive. Pittsburgh, PA

15213, United States. E-mail: [andersoncj@upmc.edu](mailto:andersoncj@upmc.edu).

|                                                                                                                          |   |
|--------------------------------------------------------------------------------------------------------------------------|---|
| <b>Figure S1.</b> Size distribution of (a) PAA/1, (b) PAA/2 and (c) PAA/3 and d) $\zeta$ -potentials.....                | 2 |
| <b>Table S1.</b> Average %ID/g of ROI analysis with PAA/3( <sup>64</sup> Cu) or free <sup>64</sup> Cu.....               | 2 |
| <b>Figure S2.</b> Stability of PAA/2( <sup>64</sup> Cu) and PAA/3( <sup>64</sup> Cu) in PBS, mouse serum and with EDTA.. | 3 |

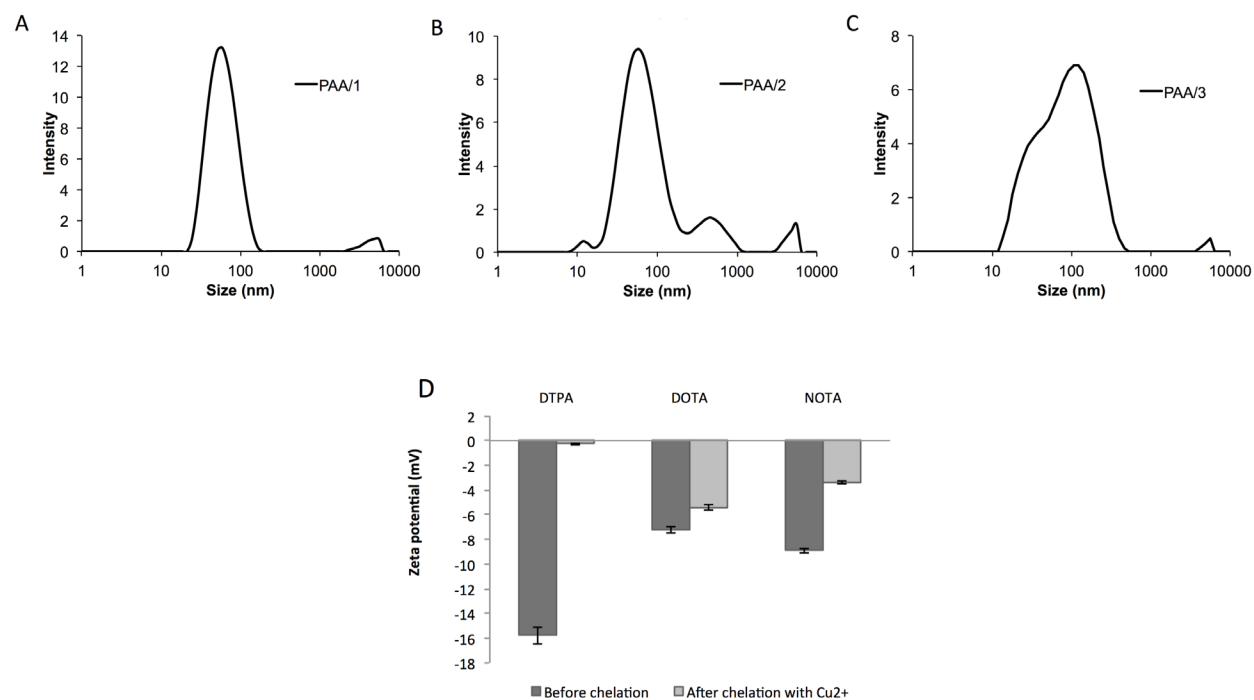

**Figure S1.** Size distribution of (a) PAA/1, (b) PAA/2 and (c) PAA/3 as measured by DLS and d)  $\zeta$ -potentials of the nanogels before and after chelation with  $\text{Cu}^{2+}$

| PAA/3( <sup>64</sup> Cu) | 4 h  | 24 h | 48 h |
|--------------------------|------|------|------|
| Avg. tumor % ID/g        | 2.90 | 5.55 | 6.95 |
| Avg. muscle % ID/g       | 0.76 | 0.92 | 0.77 |
| Avg. heart % ID/g        | 13.4 | 9.05 | 6.55 |
| Free <sup>64</sup> Cu    | 4 h  | 24 h | 48 h |
| Avg. tumor % ID/g        | 3.15 | 2.95 | 3.05 |
| Avg. muscle % ID/g       | 0.85 | 0.98 | 0.87 |
| Avg. heart % ID/g        | 4.15 | 3.9  | 3.95 |

**Table S1.** Average %ID/g values obtained through ROI analysis of mice containing 4T1 tumors and injected with either PAA/3(<sup>64</sup>Cu) or free <sup>64</sup>Cu.

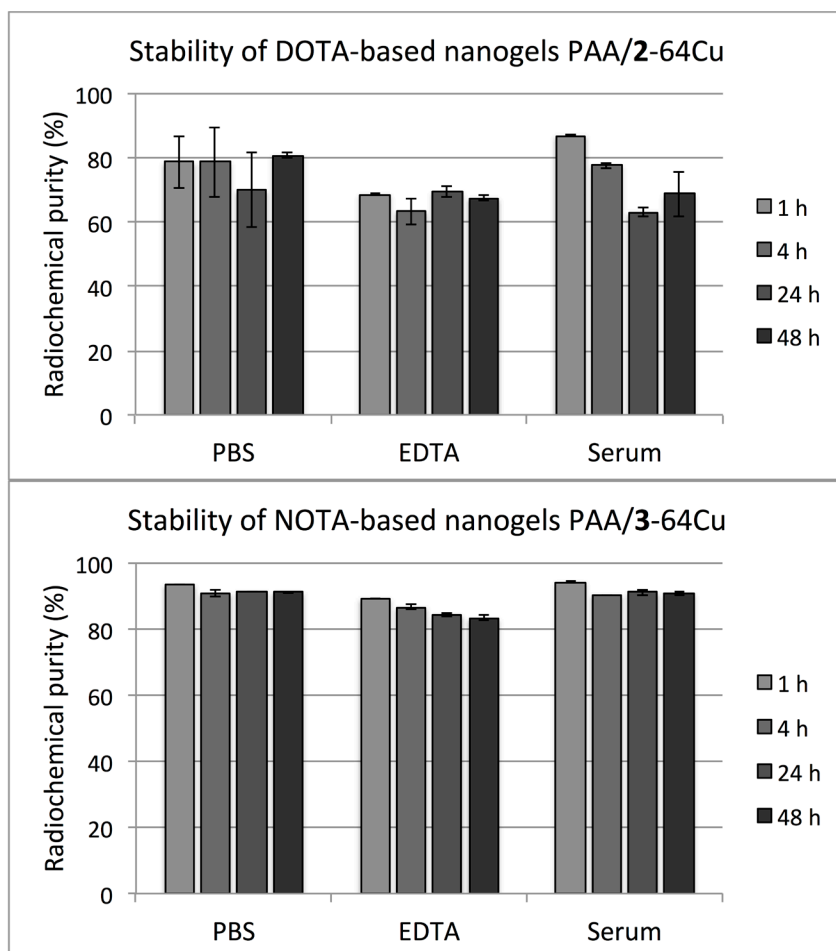

**Figure S2.** Stability measurements of PAA/2(<sup>64</sup>Cu) and PAA/3(<sup>64</sup>Cu) in PBS, mouse serum and in presence of EDTA.
